# Supplementary material
Source: Springer Nature journal article supplement (https://www.springermedizin.de/resource/supplementary/12904_2013_172_MOESM2_ESM.pdf/9517688)
Supplement: MOESM2 [file 9517688]

# DataPall Palliative Care Report

From 01-Jul-12 To 31-Jul-12

Number of Patients 61

Number of Appointments 66

**Table 1: KS Appointments**

|               |   |             |   |                   |   |
|---------------|---|-------------|---|-------------------|---|
| Total Males   | 2 | New Males   | 0 | Follow-up Males   | 2 |
| Total Females | 1 | New Females | 0 | Follow-up Females | 1 |

Doses of Vincristine 1 Males on Vincristine 1 Females on Vincristine 0

# Family Meetings 36 # Education Sessions 38 # Bereavements 36

**Table 2: Number of Inpatient Visits**

|               |    |                    |   |             |    |               |   |               |    |
|---------------|----|--------------------|---|-------------|----|---------------|---|---------------|----|
| Total Males   | 19 | Males Discharged   | 6 | New Males   | 11 | Male Deaths   | 0 | Other Males   | 13 |
| Total Females | 13 | Females Discharged | 4 | New Females | 5  | Female Deaths | 0 | Other Females | 9  |

**Table 3: Discharge Planning**

|                     |    |                         |    |
|---------------------|----|-------------------------|----|
| Males Counsellled   | 13 | Males Referred to HBC   | 21 |
| Females Counsellled | 10 | Females Referred To HBC | 13 |

**Table 4: Number of Home-based Visits**

|               |    |             |    |                   |   |
|---------------|----|-------------|----|-------------------|---|
| Total Males   | 12 | New Males   | 12 | Follow-up Males   | 2 |
| Total Females | 9  | New Females | 9  | Follow-up Females | 2 |

**Table 5: Number of Outpatient Visits**

|               |   |             |   |                   |   |
|---------------|---|-------------|---|-------------------|---|
| Total Males   | 8 | New Males   | 6 | Follow-up Males   | 2 |
| Total Females | 5 | New Females | 3 | Follow-up Females | 2 |

**Table 6: Morphine Dispensed**

|                      |      |                                 |    |
|----------------------|------|---------------------------------|----|
| Weak Morphine (mL)   | 7500 | # Visits Weak Morphine Given    | 62 |
| Strong Morphine (mL) | 8200 | # Visits Strong Morphine Given  | 63 |
| # 10 mg Tablets      | 16   | # Visits Morphine Tablets Given | 52 |

**Table 7: Summary of Inpatient Diagnoses**

| Diagnosis                                | Males | Females | TOTAL |
|------------------------------------------|-------|---------|-------|
| AFP - Acute Flaccid Paralysis            | 2     | 0       | 2     |
| BM - Bacterial Meningitis                | 2     | 1       | 3     |
| CABR - Breast Cancer                     | 1     | 0       | 1     |
| CACX - Cervical Cancer                   | 0     | 1       | 1     |
| CALU - Lung Cancer                       | 0     | 1       | 1     |
| CALV - Liver Cancer                      | 3     | 1       | 4     |
| CAOE - Oesophageal Cancer                | 1     | 2       | 3     |
| CAOT - Cancer (Other)                    | 1     | 0       | 1     |
| CAOV - Ovarian Cancer                    | 0     | 1       | 1     |
| CAPN - Pancreatic Cancer                 | 3     | 4       | 7     |
| CAST - Stomach Cancer                    | 2     | 0       | 2     |
| CCF - Congestive Cardiac Failure         | 1     | 1       | 2     |
| CM - Cryptococcal Meningitis             | 1     | 1       | 2     |
| CVA - Cerebrovascular Accident           | 1     | 0       | 1     |
| HIV - HIV/AIDS                           | 2     | 0       | 2     |
| HPL - Hemiplegia (left side)             | 0     | 1       | 1     |
| HPR - Hemiplegia (right side)            | 1     | 1       | 2     |
| HPT- Hepatoma                            | 0     | 1       | 1     |
| HTN - Hypertension                       | 0     | 2       | 2     |
| LC - Liver Cirrhosis                     | 3     | 1       | 4     |
| NEUR - Neurological                      | 2     | 0       | 2     |
| PP - Paraplegia                          | 1     | 2       | 3     |
| QP - Quadriplegia                        | 3     | 1       | 4     |
| RHD - Rheumatic Heart Disease            | 1     | 0       | 1     |
| SCD - Sickle Cell Disease                | 0     | 1       | 1     |
| TB - (Pulmonary) Tuberculosis            | 1     | 0       | 1     |
| TSS - Tropical Splenomegaly Syndrome     | 0     | 1       | 1     |
| URTI - Upper Respiratory Tract Infection | 1     | 0       | 1     |

**Table 8: Summary of Outpatient Diagnoses**

| Diagnosis                            | Males | Females | TOTAL |
|--------------------------------------|-------|---------|-------|
| BM - Bacterial Meningitis            | 1     | 1       | 2     |
| CABR - Breast Cancer                 | 0     | 1       | 1     |
| CALV - Liver Cancer                  | 0     | 1       | 1     |
| CAOE - Oesophageal Cancer            | 1     | 0       | 1     |
| CAOV - Ovarian Cancer                | 1     | 0       | 1     |
| CAPR - Prostate Cancer               | 1     | 0       | 1     |
| CAST - Stomach Cancer                | 1     | 1       | 2     |
| CCF - Congestive Cardiac Failure     | 2     | 0       | 2     |
| CVA - Cerebrovascular Accident       | 0     | 1       | 1     |
| HIV - HIV/AIDS                       | 1     | 1       | 2     |
| HPL - Hemiplegia (left side)         | 0     | 1       | 1     |
| HTN - Hypertension                   | 1     | 0       | 1     |
| KS - Kaposi's Sarcoma                | 1     | 1       | 2     |
| LC - Liver Cirrhosis                 | 1     | 0       | 1     |
| PP - Paraplegia                      | 0     | 1       | 1     |
| QP - Quadriplegia                    | 0     | 1       | 1     |
| RHD - Rheumatic Heart Disease        | 1     | 0       | 1     |
| TSS - Tropical Splenomegaly Syndrome | 1     | 0       | 1     |

**Table 9: Summary of Home-based Diagnoses**

| Diagnosis                            | Males | Females | TOTAL |
|--------------------------------------|-------|---------|-------|
| AFP - Acute Flaccid Paralysis        | 4     | 0       | 4     |
| BM - Bacterial Meningitis            | 1     | 0       | 1     |
| CALU - Lung Cancer                   | 1     | 1       | 2     |
| CAOE - Oesophageal Cancer            | 1     | 0       | 1     |
| CAOV - Ovarian Cancer                | 1     | 1       | 2     |
| CAPN - Pancreatic Cancer             | 1     | 1       | 2     |
| CAPR - Prostate Cancer               | 3     | 1       | 4     |
| CAST - Stomach Cancer                | 0     | 1       | 1     |
| CCF - Congestive Cardiac Failure     | 1     | 0       | 1     |
| CM - Cryptococcal Meningitis         | 1     | 1       | 2     |
| CVA - Cerebrovascular Accident       | 2     | 1       | 3     |
| HPL - Hemiplegia (left side)         | 0     | 1       | 1     |
| HTN - Hypertension                   | 1     | 0       | 1     |
| NEUR - Neurological                  | 1     | 1       | 2     |
| PP - Paraplegia                      | 0     | 2       | 2     |
| QP - Quadriplegia                    | 1     | 1       | 2     |
| RHD - Rheumatic Heart Disease        | 1     | 0       | 1     |
| SCD - Sickle Cell Disease            | 3     | 0       | 3     |
| TB - (Pulmonary) Tuberculosis        | 0     | 2       | 2     |
| TSS - Tropical Splenomegaly Syndrome | 0     | 1       | 1     |

**Table 10: Summary of Aggregate Patient Diagnoses**

| Diagnosis                                | Males | Females | TOTAL |
|------------------------------------------|-------|---------|-------|
| AFP - Acute Flaccid Paralysis            | 6     |         |       |
| BM - Bacterial Meningitis                | 5     | 3       | 8     |
| CABR - Breast Cancer                     | 1     | 1       | 2     |
| CACX - Cervical Cancer                   |       | 1       |       |
| CALU - Lung Cancer                       | 1     | 1       | 2     |
| CALV - Liver Cancer                      | 3     | 1       | 4     |
| CAOE - Oesophageal Cancer                | 3     | 2       | 5     |
| CAOT - Cancer (Other)                    | 1     |         |       |
| CAOV - Ovarian Cancer                    | 2     | 1       | 3     |
| CAPN - Pancreatic Cancer                 | 2     | 6       | 8     |
| CAPR - Prostate Cancer                   | 2     | 1       | 3     |
| CAST - Stomach Cancer                    | 5     | 3       | 8     |
| CCF - Congestive Cardiac Failure         | 2     | 1       | 3     |
| CM - Cryptococcal Meningitis             | 1     | 3       | 4     |
| CVA - Cerebrovascular Accident           | 3     | 1       | 4     |
| HIV - HIV/AIDS                           | 3     | 1       | 4     |
| HPL - Hemiplegia (left side)             |       | 3       |       |
| HPR - Hemiplegia (right side)            | 1     | 1       | 2     |
| HPT- Hepatoma                            |       | 1       |       |
| HTN - Hypertension                       | 2     | 2       | 4     |
| KS - Kaposi's Sarcoma                    | 1     | 1       | 2     |
| LC - Liver Cirrhosis                     | 4     | 1       | 5     |
| NEUR - Neurological                      | 3     | 1       | 4     |
| PP - Paraplegia                          | 1     | 5       | 6     |
| QP - Quadriplegia                        | 2     | 2       | 4     |
| RHD - Rheumatic Heart Disease            | 3     |         |       |
| SCD - Sickle Cell Disease                | 3     | 1       | 4     |
| TB - (Pulmonary) Tuberculosis            | 1     | 2       | 3     |
| TSS - Tropical Splenomegaly Syndrome     | 1     | 2       | 3     |
| URTI - Upper Respiratory Tract Infection | 1     |         |       |

**Table 11: Number of Patients by Age Group and Gender**

| Age (years) | Male | Female | Total |
|-------------|------|--------|-------|
| 0-5:        | 0    | 0      | 0     |
| 6-10:       | 0    | 0      | 0     |
| 11-15:      | 0    | 0      | 0     |
| 16-45:      | 13   | 8      | 21    |
| 46+:        | 25   | 15     | 40    |
| Total:      | 38   | 23     | 61    |

**Table 13: Change in Patient Status and Outlook**

| Improvement  | Number |
|--------------|--------|
| Significant: | 0      |
| Moderate:    | 0      |
| Mild:        | 0      |
| No Change:   | 0      |
| Worsened:    | 0      |
| Unreported:  | 61     |
| Total:       | 61     |

**Table 12: Number of Patients Needing Assistance**

| Assistance     | Number |
|----------------|--------|
| Bathing:       | 33     |
| Dressing:      | 33     |
| Feeding:       | 33     |
| Mouth Care:    | 41     |
| Physiotherapy: | 28     |
| Positioning:   | 30     |
| Toilet:        | 31     |
| Wound Care:    | 33     |
| Other:         | 31     |
| Unreported:    | 0      |
| Total:         | 61     |

**Table 14: Reasons for Coming to Palliative Care**

| Reason                      | # of Patients |
|-----------------------------|---------------|
| Counselling:                | 23            |
| Diagnosis:                  | 0             |
| End of Life Care:           | 33            |
| Pain or Symptom Management: | 0             |
| Other/<br>Physiotherapy:    | 39            |
| Unknown/<br>Unreported:     | 0             |

**Table 15: Palliative Performance Scale (PPS)**

| PPS (%)  | # of Patients |
|----------|---------------|
| 0-30:    | 25            |
| 40-60:   | 41            |
| 70-100:  | 0             |
| Unknown: | 0             |

**Table 16: HIV Test Results**

| Age (years) | REACTIVE |        |       | NON-REACTIVE |        |       |
|-------------|----------|--------|-------|--------------|--------|-------|
|             | Male     | Female | Total | Male         | Female | Total |
| 0-25        | 2        | 1      | 3     | 1            | 5      | 6     |
| 26-35       | 2        | 0      | 2     | 1            | 2      | 3     |
| 36-45       | 0        | 1      | 1     | 1            | 4      | 5     |
| 46+         | 0        | 2      | 2     | 5            | 7      | 12    |
| Total       | 4        | 4      | 8     | 8            | 18     | 26    |

TOTAL Tested: 34

**Table 17: Summary of Treatments**

| Treatment                  | Number of Times Given |
|----------------------------|-----------------------|
| AMI - Amitriptylline       | 3                     |
| AMOX - Amoxicillin         | 13                    |
| ASA - Aspirin              | 6                     |
| ATEN - Atenolol            | 6                     |
| BEN- Benzathine            | 8                     |
| BRU - Brufen               | 3                     |
| CAP - Captopril            | 3                     |
| COD - Codeine              | 5                     |
| CYC - Cyclizine            | 6                     |
| DCL - Diclofenac           | 5                     |
| DGX - Digoxin              | 6                     |
| DXM - Dexamethazole        | 6                     |
| FUR - Furosemide           | 4                     |
| GLY - Glycerin             | 10                    |
| HCT - Hydrochlorothiazide  | 4                     |
| HLP - Haloperidol          | 7                     |
| LAS - Lasix                | 9                     |
| MAG - Magnesium Salicylate | 6                     |
| MCP - Metoclopramide       | 9                     |
| MTR - Metronidazole        | 9                     |
| NEB - Nebulizer            | 2                     |
| NFP - Nifedipine           | 9                     |
| O2 - Oxygen Therapy        | 11                    |
| OMP - Omeprazole           | 8                     |
| PB - Phenobarbital         | 8                     |
| PCM - Paracetamol          | 10                    |
| PIR - Piriton              | 6                     |
| PRO - Promethazine         | 3                     |
| SNK - Senakot              | 6                     |
| TA - Tranexamic Acid       | 2                     |
| TMX - Tamoxifen            | 3                     |
| VIN - Vincristine          | 7                     |
